# Supplementary material for: Enhanced mitochondrial function and delivery from adipose-derived stem cell spheres via the EZH2-H3K27me3-PPARγ pathway for advanced therapy
Source: Springer Nature journal article supplement (doi:10.1186/s13287-025-04164-1), 2025-03-11
Supplement: MOESM12 [file 13287_2025_4164_MOESM12_ESM.pdf]

**A**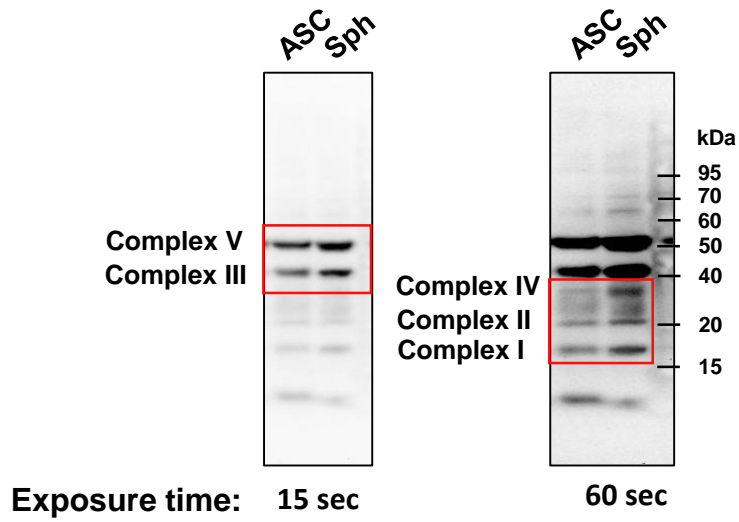**B**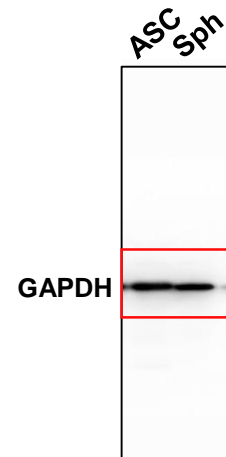

**Fig. S11. Uncropped full-length western blots corresponding to Fig. 2D.** (A) Mitochondrial electron transport chain complexes and (B) GAPDH. Red boxes indicate the regions that were cropped and shown in the main text.

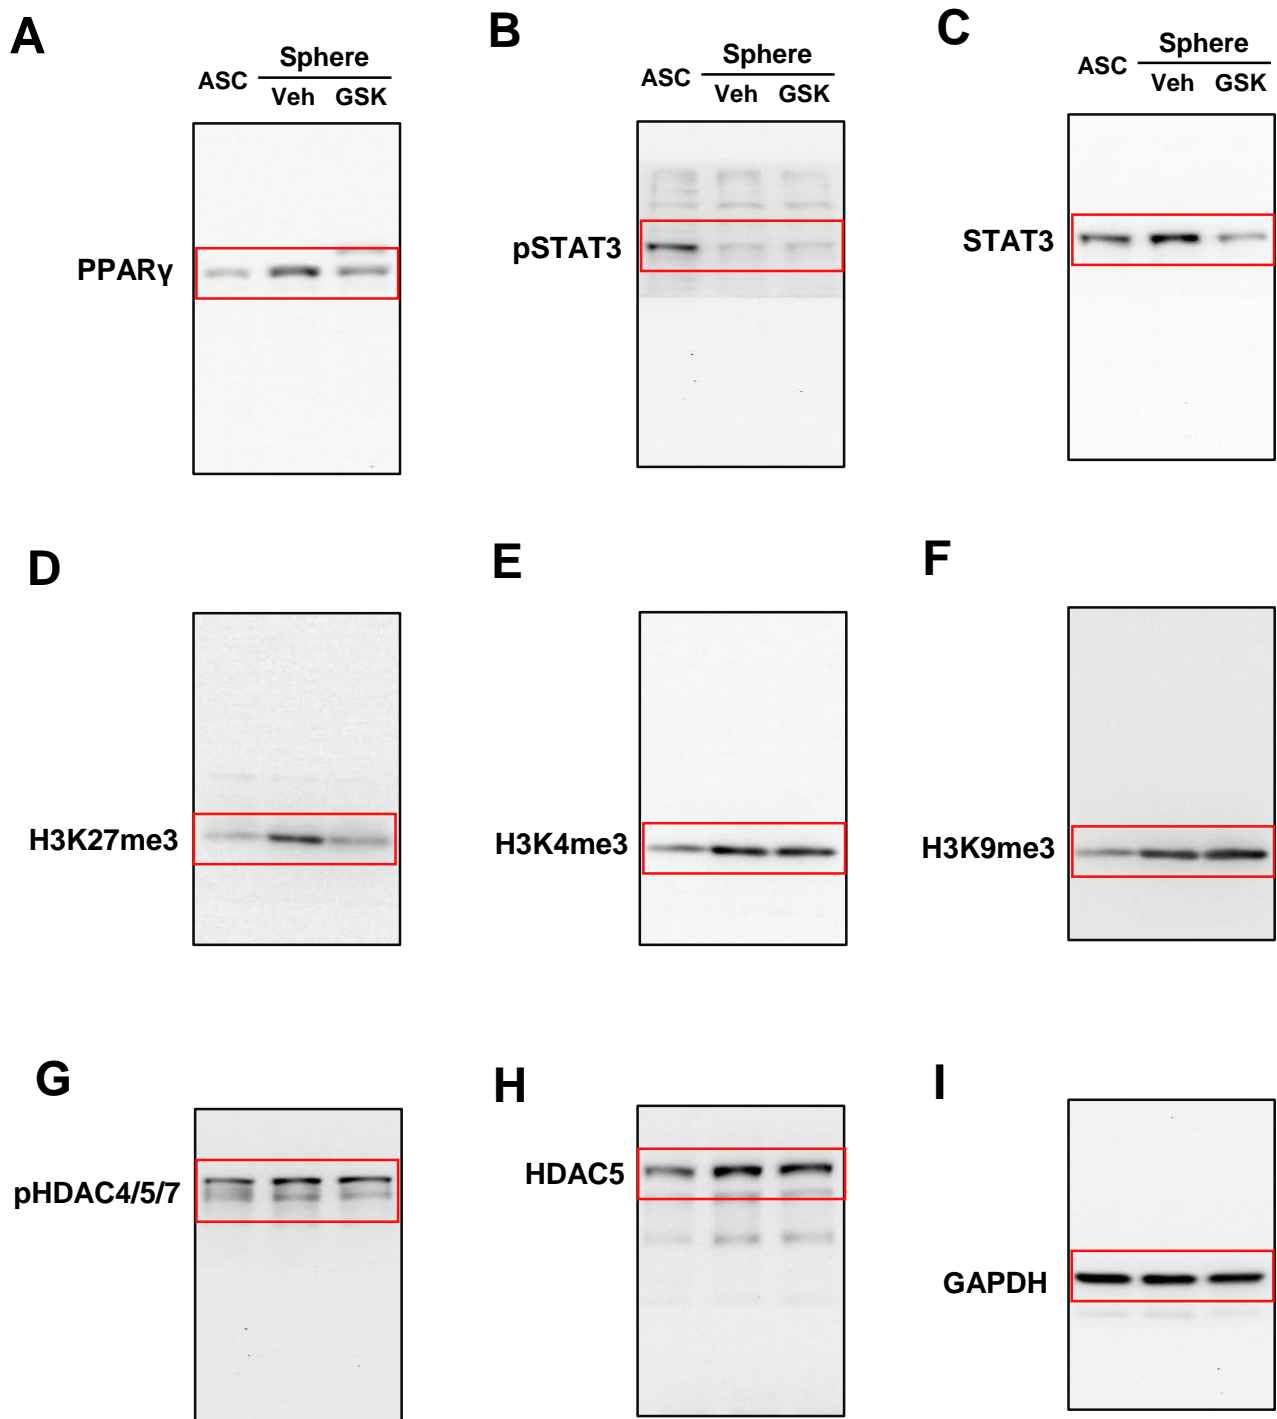

**Fig. S12. Uncropped full-length western blots corresponding to Fig. 5B.** (A) PPAR $\gamma$  (B) phospho-STAT3, (C) STAT3, (D) H3K27me3, (E) H3K4me3, (F) H3K9me3, (G) phospho-HDAC4/5/7, (H) HDAC5, and (I) GAPDH. Red boxes indicate the regions that were cropped and shown in the main text.

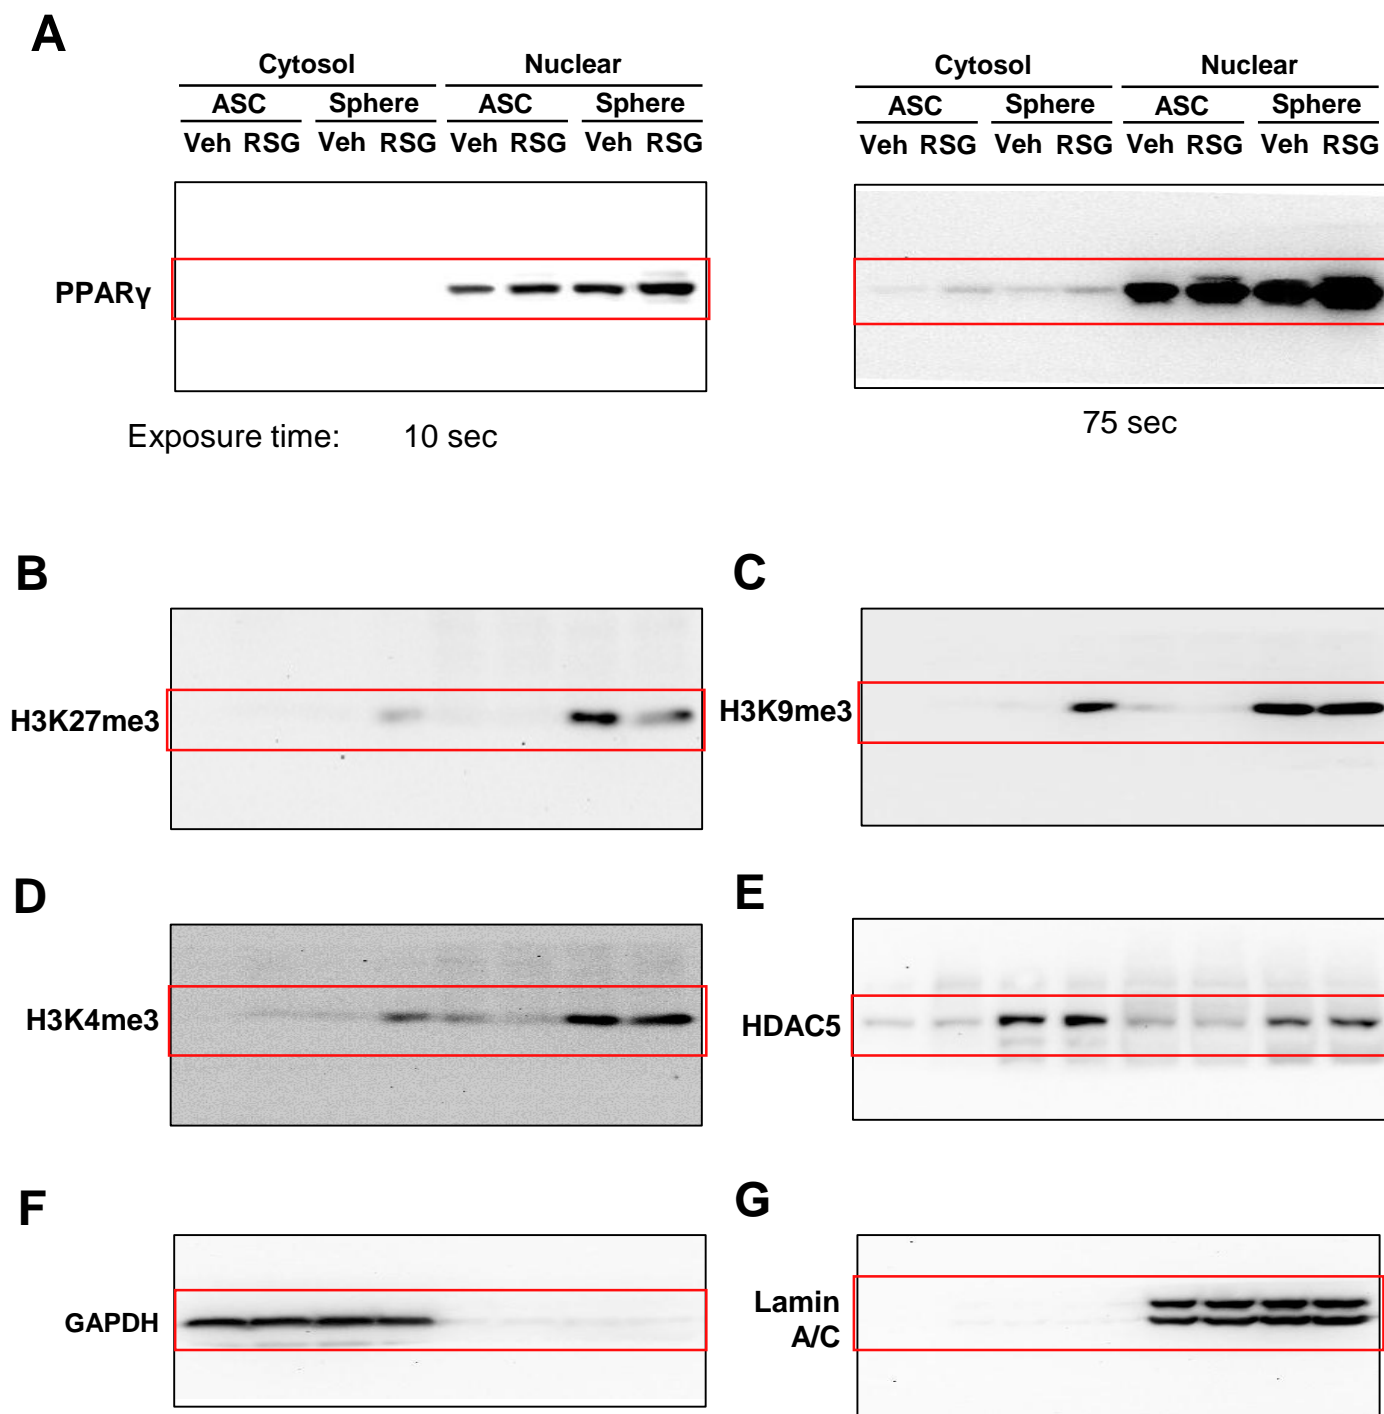

**Fig. S13. Uncropped full-length western blots corresponding to Fig. 5E.** (A) PPAR $\gamma$ , (B) H3K27me3, (C) H3K9me3, (D) H3K4me3, (E) HDAC5, (F) GAPDH, and (G) Lamin A/C. Red boxes indicate the regions that were cropped and shown in the main text.

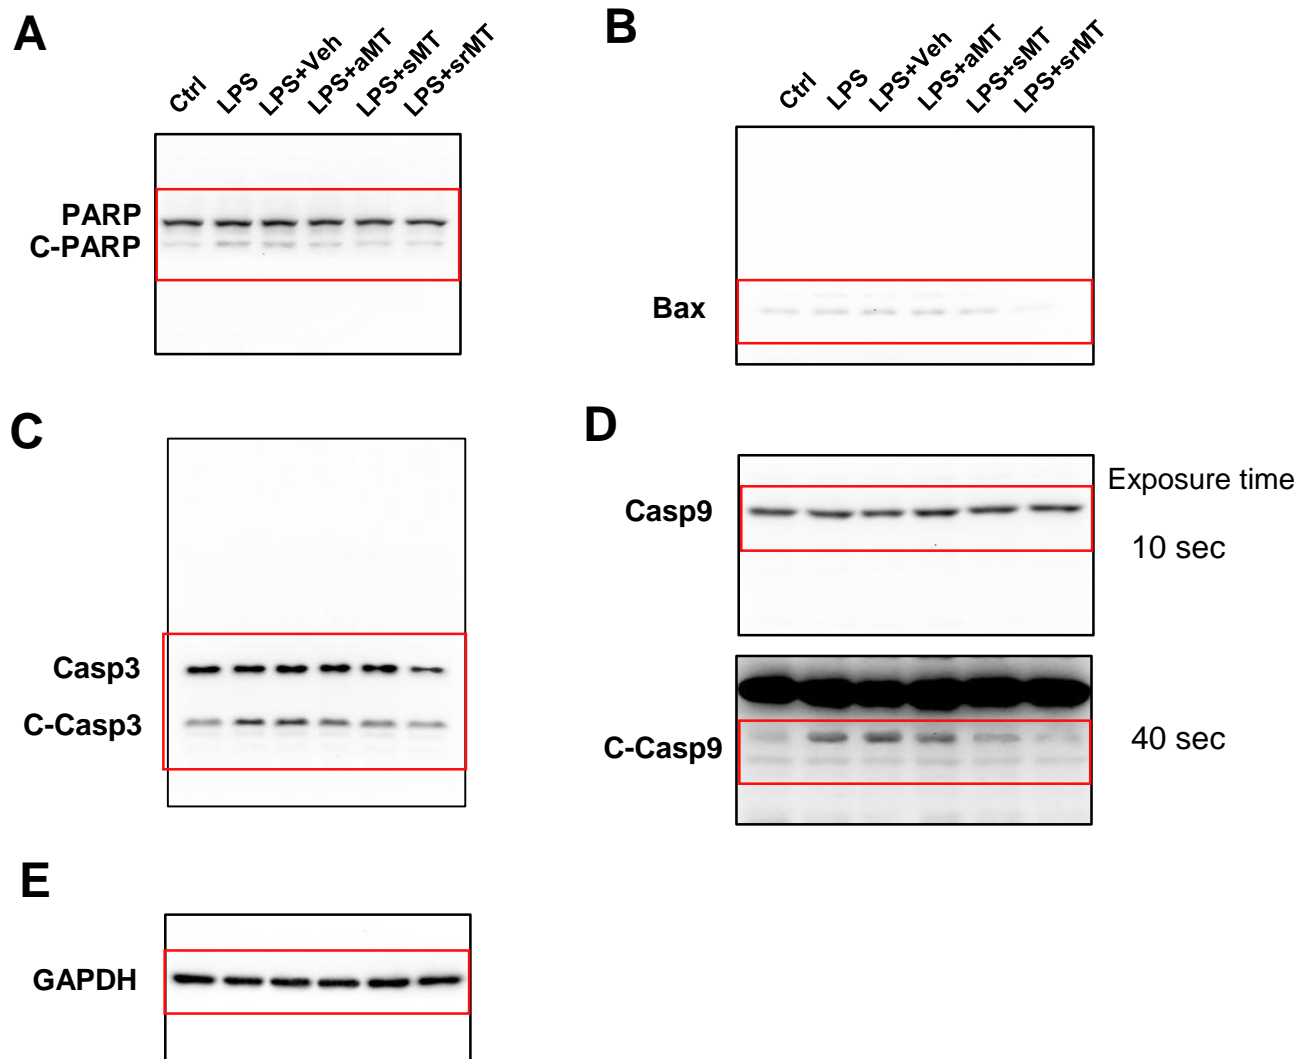

**Fig. S14. Uncropped full-length western blots corresponding to Fig. 6B.** (A) PARP and cleaved PARP, (B) BAX, (C) Caspase-3 and cleaved Caspase-3, (D) Caspase-9 and cleaved Caspase-9, and (E) GAPDH. Red boxes indicate the regions that were cropped and shown in the main text.
